# Supplementary material for: Core Habitat Resilience and Marginal Contraction: Projected Mid-Century Distribution Dynamics of Ophiocordyceps sinensis across the Tibetan Plateau under Climate Scenarios
Source: Research Square preprint supplement (doi:10.21203/rs.3.rs-7577996/v1), 2025-09-26
Supplement: Supplementary file 2 [file 54b5a5b62a03fd258d275928.docx]

Table 1 Geographical distribution data of *Ophiocordyceps sinensis*

| species | Longitude | Latitude |
| --- | --- | --- |
| *Ophiocordyceps sinensis* | 100.0042 | 34.32083 |
| *Ophiocordyceps sinensis* | 100.0375 | 29.1375 |
| *Ophiocordyceps sinensis* | 100.0875 | 32.02917 |
| *Ophiocordyceps sinensis* | 100.1292 | 34.37083 |
| *Ophiocordyceps sinensis* | 100.1708 | 34.50417 |
| *Ophiocordyceps sinensis* | 100.1708 | 37.32083 |
| *Ophiocordyceps sinensis* | 100.1958 | 27.07083 |
| *Ophiocordyceps sinensis* | 100.1958 | 34.27083 |
| *Ophiocordyceps sinensis* | 100.1958 | 34.67083 |
| *Ophiocordyceps sinensis* | 100.2208 | 38.02083 |
| *Ophiocordyceps sinensis* | 100.2542 | 34.32917 |
| *Ophiocordyceps sinensis* | 100.2542 | 37.34583 |
| *Ophiocordyceps sinensis* | 100.2708 | 34.47917 |
| *Ophiocordyceps sinensis* | 100.3375 | 37.72917 |
| *Ophiocordyceps sinensis* | 100.4042 | 34.47083 |
| *Ophiocordyceps sinensis* | 100.4292 | 33.29583 |
| *Ophiocordyceps sinensis* | 100.5125 | 33.17917 |
| *Ophiocordyceps sinensis* | 100.5375 | 36.4625 |
| *Ophiocordyceps sinensis* | 100.5875 | 30.57917 |
| *Ophiocordyceps sinensis* | 100.6292 | 35.22917 |
| *Ophiocordyceps sinensis* | 100.6458 | 38.0875 |
| *Ophiocordyceps sinensis* | 100.6542 | 38.10417 |
| *Ophiocordyceps sinensis* | 100.6542 | 38.1125 |
| *Ophiocordyceps sinensis* | 100.7542 | 35.57083 |
| *Ophiocordyceps sinensis* | 100.8292 | 37.67083 |
| *Ophiocordyceps sinensis* | 100.8792 | 32.85417 |
| *Ophiocordyceps sinensis* | 101.0708 | 37.07917 |
| *Ophiocordyceps sinensis* | 101.1708 | 30.57917 |
| *Ophiocordyceps sinensis* | 101.2708 | 37.25417 |
| *Ophiocordyceps sinensis* | 101.2792 | 36.72083 |
| *Ophiocordyceps sinensis* | 101.3125 | 37.6875 |
| *Ophiocordyceps sinensis* | 101.3458 | 30.05417 |
| *Ophiocordyceps sinensis* | 101.4458 | 36.35417 |
| *Ophiocordyceps sinensis* | 101.4708 | 35.1125 |
| *Ophiocordyceps sinensis* | 101.4708 | 36.02083 |
| *Ophiocordyceps sinensis* | 101.5708 | 36.47917 |
| *Ophiocordyceps sinensis* | 101.5708 | 36.5125 |
| *Ophiocordyceps sinensis* | 101.6208 | 34.74583 |
| *Ophiocordyceps sinensis* | 101.6875 | 32.9375 |
| *Ophiocordyceps sinensis* | 101.9292 | 36.27083 |
| *Ophiocordyceps sinensis* | 101.9542 | 30.02917 |
| *Ophiocordyceps sinensis* | 101.9625 | 30.0375 |
| *Ophiocordyceps sinensis* | 101.9875 | 32.8625 |
| *Ophiocordyceps sinensis* | 102.0208 | 37.22917 |
| *Ophiocordyceps sinensis* | 102.0292 | 33.97083 |
| *Ophiocordyceps sinensis* | 102.1042 | 37.02083 |
| *Ophiocordyceps sinensis* | 102.1125 | 34.02083 |
| *Ophiocordyceps sinensis* | 102.1292 | 36.99583 |
| *Ophiocordyceps sinensis* | 102.1375 | 32.69583 |
| *Ophiocordyceps sinensis* | 102.1375 | 32.70417 |
| *Ophiocordyceps sinensis* | 102.1542 | 34.07917 |
| *Ophiocordyceps sinensis* | 102.2125 | 34.14583 |
| *Ophiocordyceps sinensis* | 102.2625 | 31.19583 |
| *Ophiocordyceps sinensis* | 102.2625 | 31.20417 |
| *Ophiocordyceps sinensis* | 102.2708 | 31.19583 |
| *Ophiocordyceps sinensis* | 102.2792 | 31.20417 |
| *Ophiocordyceps sinensis* | 102.2958 | 31.22917 |
| *Ophiocordyceps sinensis* | 102.3125 | 31.1625 |
| *Ophiocordyceps sinensis* | 102.3125 | 31.19583 |
| *Ophiocordyceps sinensis* | 102.3125 | 31.20417 |
| *Ophiocordyceps sinensis* | 102.3125 | 31.22917 |
| *Ophiocordyceps sinensis* | 102.3208 | 31.14583 |
| *Ophiocordyceps sinensis* | 102.3208 | 31.20417 |
| *Ophiocordyceps sinensis* | 102.3208 | 31.2125 |
| *Ophiocordyceps sinensis* | 102.3208 | 31.22083 |
| *Ophiocordyceps sinensis* | 102.3208 | 31.22917 |
| *Ophiocordyceps sinensis* | 102.3292 | 31.1375 |
| *Ophiocordyceps sinensis* | 102.3292 | 31.15417 |
| *Ophiocordyceps sinensis* | 102.3292 | 31.20417 |
| *Ophiocordyceps sinensis* | 102.3292 | 31.2125 |
| *Ophiocordyceps sinensis* | 102.3375 | 31.20417 |
| *Ophiocordyceps sinensis* | 102.3542 | 31.19583 |
| *Ophiocordyceps sinensis* | 102.3708 | 30.99583 |
| *Ophiocordyceps sinensis* | 102.3708 | 31.17083 |
| *Ophiocordyceps sinensis* | 102.3792 | 31.1625 |
| *Ophiocordyceps sinensis* | 102.4375 | 31.3125 |
| *Ophiocordyceps sinensis* | 102.5375 | 34.9875 |
| *Ophiocordyceps sinensis* | 102.6792 | 36.9625 |
| *Ophiocordyceps sinensis* | 102.7625 | 36.97917 |
| *Ophiocordyceps sinensis* | 102.8042 | 37.1875 |
| *Ophiocordyceps sinensis* | 102.8208 | 36.94583 |
| *Ophiocordyceps sinensis* | 102.8292 | 36.9375 |
| *Ophiocordyceps sinensis* | 102.9042 | 33.07083 |
| *Ophiocordyceps sinensis* | 103.2292 | 32.54583 |
| *Ophiocordyceps sinensis* | 103.3208 | 34.20417 |
| *Ophiocordyceps sinensis* | 103.3292 | 34.20417 |
| *Ophiocordyceps sinensis* | 103.3542 | 32.97917 |
| *Ophiocordyceps sinensis* | 103.4208 | 33.0125 |
| *Ophiocordyceps sinensis* | 103.8542 | 31.67917 |
| *Ophiocordyceps sinensis* | 104.5625 | 34.32083 |
| *Ophiocordyceps sinensis* | 108.8792 | 32.1625 |
| *Ophiocordyceps sinensis* | 85.97083 | 28.14583 |
| *Ophiocordyceps sinensis* | 86.00417 | 28.32917 |
| *Ophiocordyceps sinensis* | 88.52083 | 28.27083 |
| *Ophiocordyceps sinensis* | 88.87083 | 29.27083 |
| *Ophiocordyceps sinensis* | 88.90417 | 27.47083 |
| *Ophiocordyceps sinensis* | 89.07917 | 29.67083 |
| *Ophiocordyceps sinensis* | 90.00417 | 31.99583 |
| *Ophiocordyceps sinensis* | 91.00417 | 29.62917 |
| *Ophiocordyceps sinensis* | 91.10417 | 30.47917 |
| *Ophiocordyceps sinensis* | 91.25417 | 29.57917 |
| *Ophiocordyceps sinensis* | 91.37917 | 29.62083 |
| *Ophiocordyceps sinensis* | 91.5375 | 30.67083 |
| *Ophiocordyceps sinensis* | 91.6125 | 31.02917 |
| *Ophiocordyceps sinensis* | 91.77083 | 29.22917 |
| *Ophiocordyceps sinensis* | 92.02917 | 31.47083 |
| *Ophiocordyceps sinensis* | 92.0875 | 29.29583 |
| *Ophiocordyceps sinensis* | 92.15417 | 30.02917 |
| *Ophiocordyceps sinensis* | 92.2625 | 30.05417 |
| *Ophiocordyceps sinensis* | 92.27917 | 32.09583 |
| *Ophiocordyceps sinensis* | 92.32917 | 29.8375 |
| *Ophiocordyceps sinensis* | 92.4125 | 28.4375 |
| *Ophiocordyceps sinensis* | 92.72083 | 29.2875 |
| *Ophiocordyceps sinensis* | 93.07083 | 29.04583 |
| *Ophiocordyceps sinensis* | 93.12083 | 31.54583 |
| *Ophiocordyceps sinensis* | 93.15417 | 31.72917 |
| *Ophiocordyceps sinensis* | 93.17917 | 28.97083 |
| *Ophiocordyceps sinensis* | 93.22083 | 30.62917 |
| *Ophiocordyceps sinensis* | 93.3375 | 29.87083 |
| *Ophiocordyceps sinensis* | 93.3625 | 29.87917 |
| *Ophiocordyceps sinensis* | 93.45417 | 28.9625 |
| *Ophiocordyceps sinensis* | 93.5875 | 30.0625 |
| *Ophiocordyceps sinensis* | 93.67917 | 31.47917 |
| *Ophiocordyceps sinensis* | 93.77917 | 31.87917 |
| *Ophiocordyceps sinensis* | 93.8375 | 29.7875 |
| *Ophiocordyceps sinensis* | 93.8625 | 29.1125 |
| *Ophiocordyceps sinensis* | 93.8875 | 29.12917 |
| *Ophiocordyceps sinensis* | 93.92083 | 29.14583 |
| *Ophiocordyceps sinensis* | 93.97083 | 29.9875 |
| *Ophiocordyceps sinensis* | 94.02917 | 31.92083 |
| *Ophiocordyceps sinensis* | 94.12917 | 29.17917 |
| *Ophiocordyceps sinensis* | 94.25417 | 29.57917 |
| *Ophiocordyceps sinensis* | 94.32917 | 29.6625 |
| *Ophiocordyceps sinensis* | 94.3875 | 29.37083 |
| *Ophiocordyceps sinensis* | 94.7875 | 29.9375 |
| *Ophiocordyceps sinensis* | 95.02917 | 32.92083 |
| *Ophiocordyceps sinensis* | 95.15417 | 32.80417 |
| *Ophiocordyceps sinensis* | 95.15417 | 32.82917 |
| *Ophiocordyceps sinensis* | 95.17083 | 32.67083 |
| *Ophiocordyceps sinensis* | 95.17917 | 31.5375 |
| *Ophiocordyceps sinensis* | 95.32083 | 32.8875 |
| *Ophiocordyceps sinensis* | 95.50417 | 34.52083 |
| *Ophiocordyceps sinensis* | 95.6125 | 33.84583 |
| *Ophiocordyceps sinensis* | 95.62917 | 31.42083 |
| *Ophiocordyceps sinensis* | 95.7125 | 32.9375 |
| *Ophiocordyceps sinensis* | 95.75417 | 30.82083 |
| *Ophiocordyceps sinensis* | 95.87917 | 32.94583 |
| *Ophiocordyceps sinensis* | 96.12083 | 31.19583 |
| *Ophiocordyceps sinensis* | 96.30417 | 32.9625 |
| *Ophiocordyceps sinensis* | 96.42917 | 33.79583 |
| *Ophiocordyceps sinensis* | 96.4375 | 33.27917 |
| *Ophiocordyceps sinensis* | 96.5125 | 32.57917 |
| *Ophiocordyceps sinensis* | 96.92917 | 33.02917 |
| *Ophiocordyceps sinensis* | 97.0375 | 29.32083 |
| *Ophiocordyceps sinensis* | 97.35417 | 33.12917 |
| *Ophiocordyceps sinensis* | 97.4125 | 28.77083 |
| *Ophiocordyceps sinensis* | 97.47083 | 28.64583 |
| *Ophiocordyceps sinensis* | 97.49583 | 33.14583 |
| *Ophiocordyceps sinensis* | 98.07083 | 33.02083 |
| *Ophiocordyceps sinensis* | 98.20417 | 31.4875 |
| *Ophiocordyceps sinensis* | 98.42917 | 29.4375 |
| *Ophiocordyceps sinensis* | 98.4375 | 32.47917 |
| *Ophiocordyceps sinensis* | 98.8625 | 28.2875 |
| *Ophiocordyceps sinensis* | 98.92083 | 28.5125 |
| *Ophiocordyceps sinensis* | 98.92917 | 28.47917 |
| *Ophiocordyceps sinensis* | 98.97083 | 30.97083 |
| *Ophiocordyceps sinensis* | 99.0125 | 28.3875 |
| *Ophiocordyceps sinensis* | 99.02917 | 37.27917 |
| *Ophiocordyceps sinensis* | 99.0375 | 28.2125 |
| *Ophiocordyceps sinensis* | 99.07083 | 28.34583 |
| *Ophiocordyceps sinensis* | 99.1125 | 34.1625 |
| *Ophiocordyceps sinensis* | 99.17083 | 31.99583 |
| *Ophiocordyceps sinensis* | 99.1875 | 37.0875 |
| *Ophiocordyceps sinensis* | 99.2125 | 31.92917 |
| *Ophiocordyceps sinensis* | 99.25417 | 35.2375 |
| *Ophiocordyceps sinensis* | 99.29583 | 38.2875 |
| *Ophiocordyceps sinensis* | 99.30417 | 37.62083 |
| *Ophiocordyceps sinensis* | 99.42917 | 26.37083 |
| *Ophiocordyceps sinensis* | 99.42917 | 38.10417 |
| *Ophiocordyceps sinensis* | 99.47083 | 36.42917 |
| *Ophiocordyceps sinensis* | 99.57083 | 30.2875 |
| *Ophiocordyceps sinensis* | 99.62917 | 27.9125 |
| *Ophiocordyceps sinensis* | 99.6375 | 34.5125 |
| *Ophiocordyceps sinensis* | 99.67917 | 33.72917 |
| *Ophiocordyceps sinensis* | 99.70417 | 27.82083 |
| *Ophiocordyceps sinensis* | 99.72083 | 28.0875 |
| *Ophiocordyceps sinensis* | 99.72083 | 34.6375 |
| *Ophiocordyceps sinensis* | 99.72917 | 26.62917 |
| *Ophiocordyceps sinensis* | 99.72917 | 34.6375 |
| *Ophiocordyceps sinensis* | 99.75417 | 33.57917 |
| *Ophiocordyceps sinensis* | 99.77917 | 34.77083 |
| *Ophiocordyceps sinensis* | 99.79583 | 36.6625 |
| *Ophiocordyceps sinensis* | 99.85417 | 34.5875 |
| *Ophiocordyceps sinensis* | 99.8625 | 34.4125 |
| *Ophiocordyceps sinensis* | 99.87083 | 34.4625 |
| *Ophiocordyceps sinensis* | 99.87083 | 34.5875 |
| *Ophiocordyceps sinensis* | 99.87917 | 33.94583 |
| *Ophiocordyceps sinensis* | 99.90417 | 34.4625 |
| *Ophiocordyceps sinensis* | 99.9125 | 34.45417 |
| *Ophiocordyceps sinensis* | 99.97083 | 26.8625 |
| *Ophiocordyceps sinensis* | 99.97917 | 35.07083 |
